# Supplementary material for: Umbilical cord thrombosis and chorioamnionitis in neonatal arterial ischaemic stroke
Source: HighWire-hosted journal article supplement (doi:10.1136/archdischild-2021-322143), 2021-06-23
Supplement: archdischild-2021-322143supp001_data_supplement.pdf [file archdischild-2021-322143supp001_data_supplement.pdf]

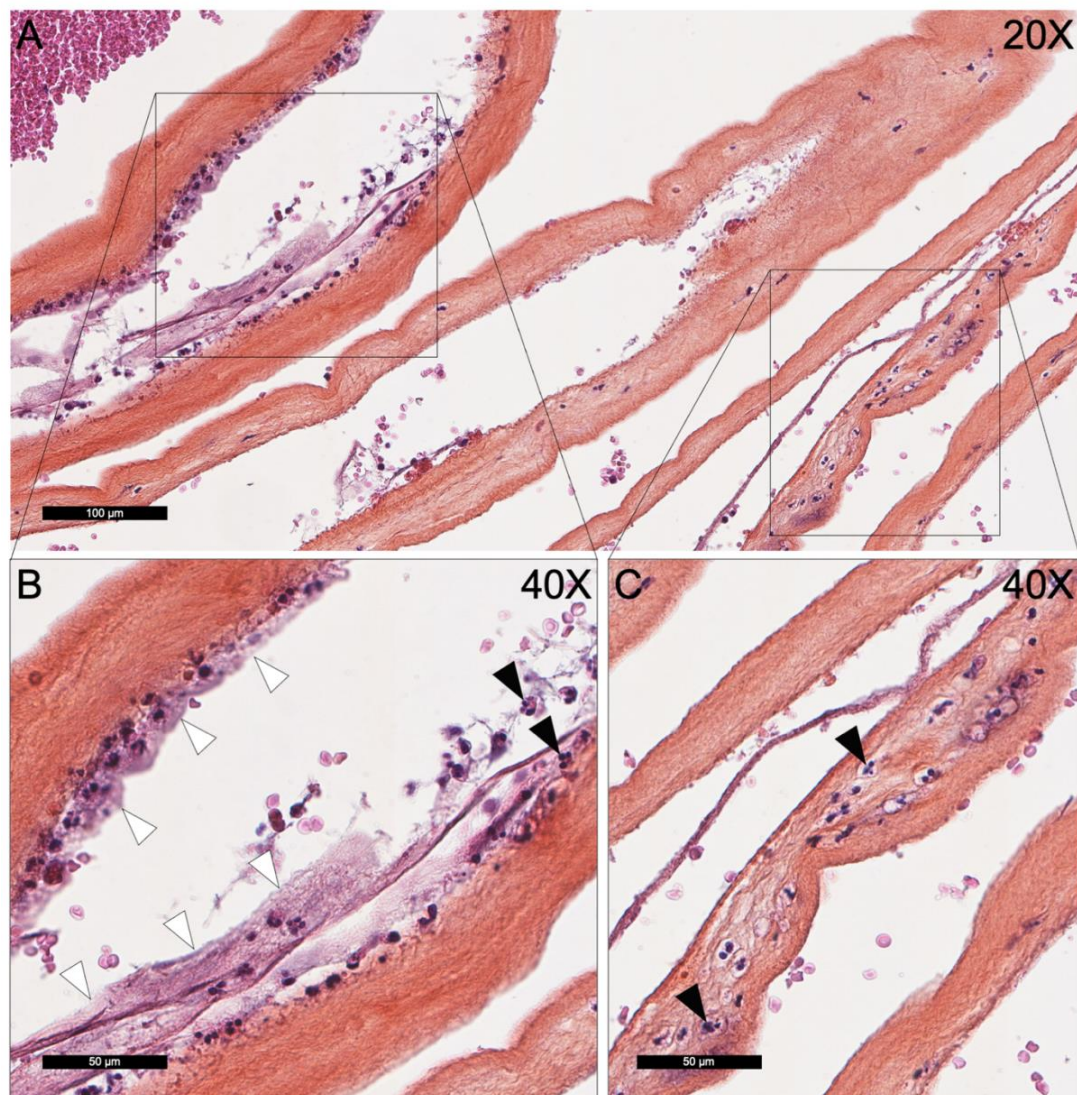

Histology examination of the placenta on HES staining (A) revealing an acute chorioamnionitis with amniocyte necrosis (white arrowheads), karyorrhexis of PMN (black arrowheads) (B), and PMN infiltration of the amnion detached from the chorionic plate (C). Abbreviations: HES, hematoxylin-eosin-saffron; PMN, polymorphonuclear cell.
